# Supplementary material for: Effect of a high dose atorvastatin as adjuvant therapy to mesalamine in attenuating inflammation and symptoms in patients with ulcerative colitis: a randomized controlled pilot study
Source: PubMed Central journal article supplement (PMC11794804; doi:10.3389/fmed.2024.1490178), 2025-01-22
Supplement: Data_Sheet_1.pdf [file Data_Sheet_1.pdf]

Multilinear regression analysis was used to evaluate the effect of age and gender on the primary and secondary outcome's variable. The results showed that age and gender were not significant predictor for primary and secondary outcomes according to the following Table.

**Multilinear regression analysis for placebo group**

| Independent variables | $\beta$ | T     | p-value | Dependent variables | Significance |
|-----------------------|---------|-------|---------|---------------------|--------------|
| Age                   | 0.011   | 0.585 | 0.564   | PMS                 | NS           |
| Gender                | 0.405   | 0.743 | 0.465   |                     |              |
| Age                   | 0.077   | 0.493 | 0.627   | SF-36               | NS           |
| Gender                | -0.481  | 0.112 | 0.911   |                     |              |
| Age                   | -0.047  | 0.725 | 0.479   | IL-6                | NS           |
| Gender                | 0.248   | 0.140 | 0.889   |                     |              |
| Age                   | -0.048  | 0.316 | 0.755   | TNF                 | NS           |
| Gender                | -3.70   | 0.894 | 0.381   |                     |              |
| Age                   | -0.180  | 1.903 | 0.070   | NO                  | NS           |
| Gender                | -5.542  | 2.148 | 0.084   |                     |              |
| Age                   | 0.024   | 0.761 | 0.454   | Calprotectin        | NS           |
| Gender                | -0.133  | 0.154 | 0.879   |                     |              |
| Age                   | 0.994   | 0.284 | 0.778   | S1P                 | NS           |
| Gender                | -17.36  | 1.854 | 0.078   |                     |              |
| Age                   | -0.271  | 2.260 | 0.098   | CRP                 | NS           |
| Gender                | -0.111  | 0.134 | 0.973   |                     |              |
| Age                   | 0.011   | 0.250 | 0.805   | ESR                 | NS           |
| Gender                | -1.149  | 0.909 | 0.373   |                     |              |

**Multilinear regression analysis for atorvastatin group.**

| Independent variables | $\beta$ | T     | p-value | Dependent variables | Significance |
|-----------------------|---------|-------|---------|---------------------|--------------|
| Age                   | - 0.055 | 2.822 | 0.105   | PMS                 | NS           |
| Gender                | 0.065   | 0.139 | 0.890   |                     |              |
| Age                   | - 0.215 | 0.817 | 0.423   | SF-36               | NS           |
| Gender                | -3.854  | 0.612 | 0.547   |                     |              |
| Age                   | 0.169   | 1.530 | 0.141   | IL-6                | NS           |
| Gender                | 0.559   | 1.348 | 0.192   |                     |              |
| Age                   | -0.411  | 0.974 | 0.341   | TNF                 | NS           |
| Gender                | -5.492  | 3.036 | 0.094   |                     |              |
| Age                   | -0.199  | 0.277 | 0.784   | NO                  | NS           |
| Gender                | -10.33  | 0.603 | 0.553   |                     |              |
| Age                   | 0.002   | 0.037 | 0.970   | Calprotectin        | NS           |
| Gender                | -0.300  | 0.229 | 0.820   |                     |              |
| Age                   | -0.763  | 0.284 | 0.236   | S1P                 | NS           |
| Gender                | -1.090  | 0.073 | 0.942   |                     |              |
| Age                   | -0.028  | 0.140 | 0.889   | CRP                 | NS           |
| Gender                | 5.614   | 1.143 | 0.266   |                     |              |
| Age                   | 0.002   | 0.047 | 0.962   | ESR                 | NS           |
| Gender                | -0.275  | 0.198 | 0.851   |                     |              |
